# Supplementary material
Source: PubMed Central journal article supplement (PMC3959896)
Supplement: NIHMS296611-supplement-Author_Information.pdf [file NIHMS296611-supplement-Author_Information.pdf]

## Author Bios

Terence P. Thornberry received his Ph.D. in Sociology from the University of Pennsylvania.

Adrienne Freeman-Gallant received her Ph.D. in Statistics from Cornell University.

Peter J. Lovegrove is a Doctoral Candidate in the Department of Sociology at the University of Colorado.

## Author Affiliation and Interests

Terence P. Thornberry is Professor of Sociology and Director of the Program Behavior Program at the Institute of Behavioral Science, University of Colorado. His research interests focus on understanding the development of delinquency and crime over the life course, the consequences of maltreatment, and intergenerational continuity in antisocial behavior.

Adrienne Freeman-Gallant is a Data Analyst for the Rochester Youth Development Study at the Hindelang Criminal Justice Research Center, University at Albany.

Peter J. Lovegrove is a Doctoral Candidate in the Department of Sociology and a Research Assistant for the Rochester Youth Development Study at the Institute of Behavioral Science, University of Colorado. His major research interest is in developmental and intergenerational patterns of delinquency.
